# Supplementary material for: Hollow polymer microrods of tunable flexibility from dense amphiphilic block copolymer brushes
Source: Royal Society of Chemistry journal article supplement (doi:10.1039/c9sm01868a), 2019-12-06
Supplement: c9sm01868a1.pdf [file c9sm01868a1.pdf]

## Supporting information

# Hollow Polymer Microrods of Tunable Flexibility from Dense Amphiphilic Block Copolymer Brushes

*Lucille Chambon, Prof Maria Vamvakaki\**

Department of Materials Science and Technology, University of Crete, 700 13 Heraklion, Crete,  
Greece and

Institute of Electronic Structure and Laser Foundation for Research and Technology - Hellas,  
700 13 Heraklion, Crete, Greece

### **Calculation of the PDMA content of the block copolymer brushes.**

The PDMA content of the block copolymers was calculated from the GPC and TGA data. From the number average molecular weight of the P(MMA-*co*-GlyMA) block ( $M_n^1$ ) and the number average molecular weight of the PDMA block ( $M_n^2$ ), the PDMA content is<sup>1</sup>:

$$\text{wt\% PDMA}_{GPC} = \frac{M_n^2}{M_n^1 + M_n^2} \quad (\text{S1})$$

It is worth noting that the PDMA content determined by equation S1 is accurate only if the chain extension efficiency of the polymer is close to 100%, and for polymers with narrow molecular weight distributions.

Alternatively, using the TGA weight loss for the rods grafted with the first P(MMA-*co*-GlyMA) block ( $\Delta W_1$ ) and the weight loss of the rods grafted with the P(MMA-*co*-GlyMA)-*b*-PDMA block copolymer ( $\Delta W_2$ ), the PDMA content is:

$$wt\% PDMA_{TGA} = 100 \left( 1 - \frac{\Delta W_1 (100 - \Delta W_2)}{\Delta W_2 (100 - \Delta W_1)} \right) \quad (S2)$$

### Calculation of the grafting density of the block copolymer brushes.

The grafting density,  $\sigma$ , of the polymer on the silica rods was calculated using the following equation<sup>2</sup>:

$$\sigma \left( \frac{chains}{nm^2} \right) = \frac{m_{polymer} (g) \cdot N_A (mol^{-1})}{m_{silica} (g) \cdot S_{sp} (nm^2 \cdot g^{-1}) \cdot M_n (g \cdot mol^{-1})} \quad (S3)$$

Where,  $M_n$  is the polymer molecular weight measured with GPC,  $S_{sp}$  is the BET specific surface

and  $N_A$  is the Avogadro number. The ratio  $\frac{m_{polymer}}{m_{silica}}$  was calculated from the respective weight losses, of the polymer functionalized particles ( $\Delta W(Si-P)$ ) and the initiator functionalized particles ( $\Delta W(Si-I)$ ), measured by TGA<sup>3</sup>:

$$\frac{m_{polymer}}{m_{silica}} = \frac{\Delta W(Si-P)}{100 - \Delta W(Si-P)} - \frac{\Delta W(Si-I)}{100 - \Delta W(Si-I)} \quad (S4)$$

## Figures and Tables

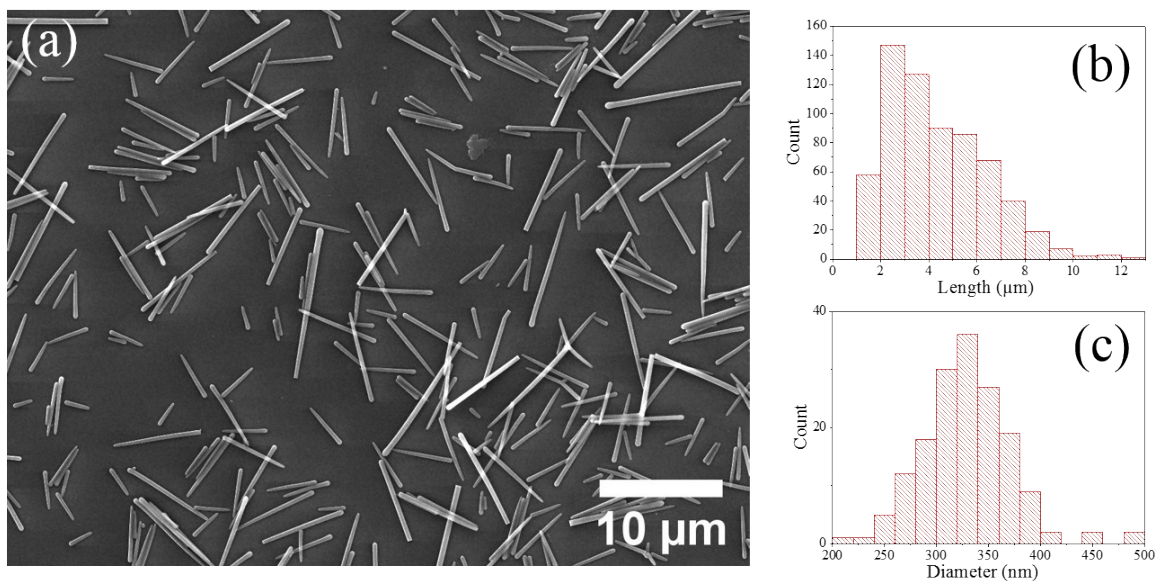

**Figure S1.** (a) SEM image, (b) length distribution and (c) diameter distribution of the silica rods.

The dimensions of the silica rods were measured using ImageJ on at least 200 particles.

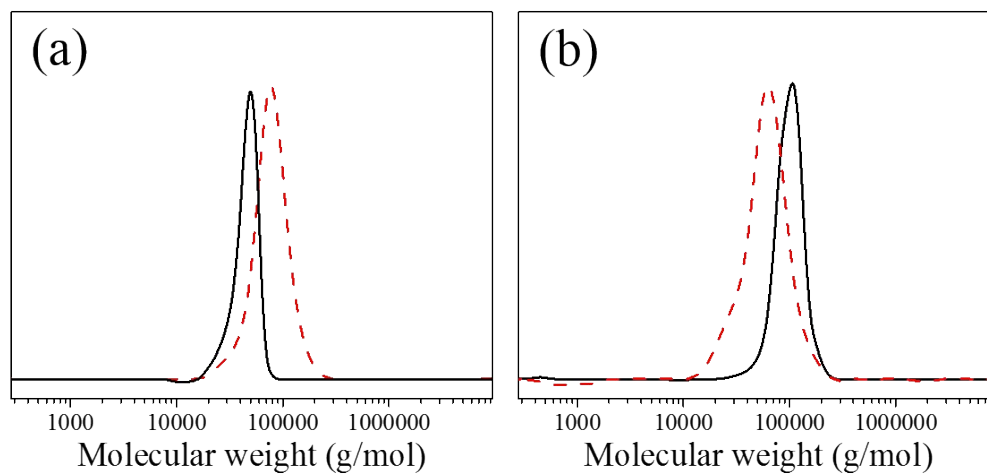

**Figure S2.** GPC traces of the "free" polymers, P(MMA-co-GlyMA) (black, solid line) and PDMA (red, dashed line), grown in solution at the same time as the grafted polymers, for (a) SiP-2 and (b) SiP-3.

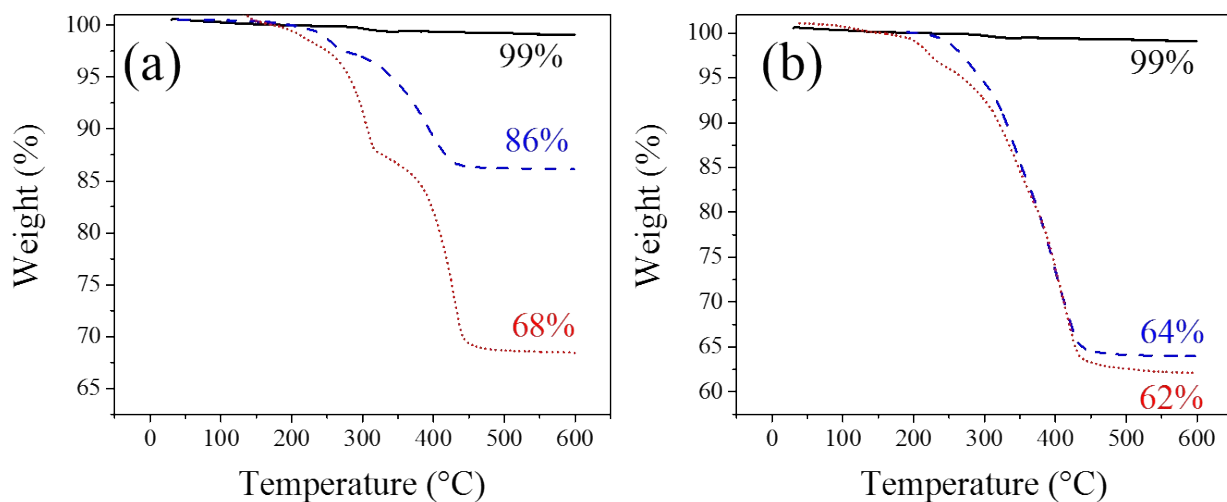

**Figure S3.** TGA analysis of the rods grafted with the initiator molecules (black, solid line), the P(MMA-co-GlyMA) block (blue, dashed line) and the P(MMA-co-GlyMA)-b-PDMA diblock copolymer (red, dotted line), for (a) SiP-2 (b) SiP-3.

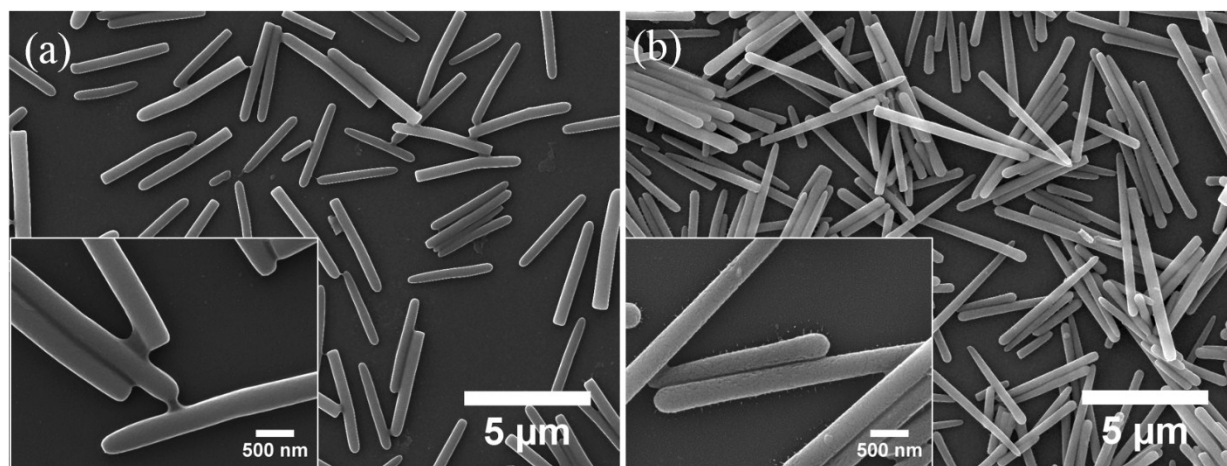

**Figure S4.** SEM images of the (a) SiP-0 and (b) SiP-2 core-shell rods. Insets show higher magnification images of the rods.

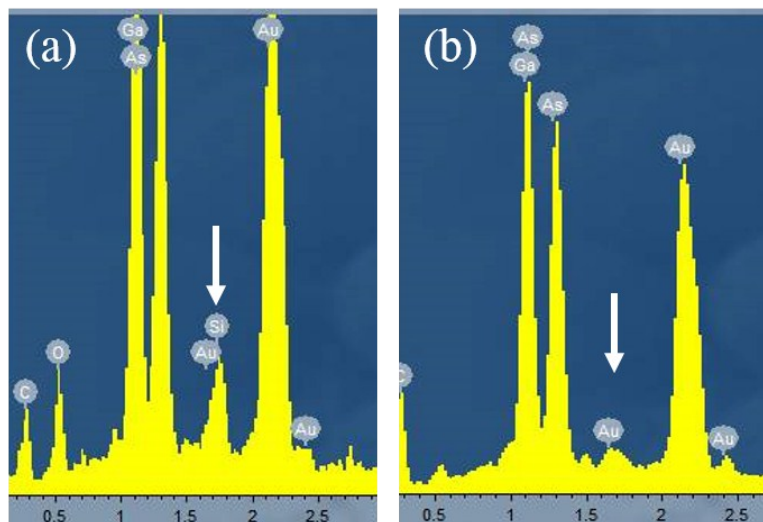

**Figure S5.** EDS analysis of (a) the SiP-2 core-shell rods and (b) the HR-2 hollow polymer rods deposited on GaAs substrates.

**Table S1.** Average dimensions of the bare silica rods, SiP-2 and SiP-3 core-shell rods and HR-2 and HR-3 hollow polymer rods.

|                                                  | Bare silica rods | SiP-2    | HR-2     | SiP-3    | HR-3      |
|--------------------------------------------------|------------------|----------|----------|----------|-----------|
| Diameter (nm) <sup>a</sup>                       | 330 ± 40         | 390 ± 40 | 550 ± 80 | 410 ± 40 | 420 ± 110 |
| Length (μm) <sup>a</sup>                         | 4 ± 2            | 4 ± 2    | 5 ± 2    | 4 ± 2    | 4 ± 2     |
| Polymer shell thickness by SEM (nm) <sup>b</sup> | -                | 30       | -        | 40       | -         |
| Polymer shell thickness by TEM (nm)              | -                | 23 ± 10  | -        | 33 ± 10  | 80 ± 10   |

<sup>a</sup> Determined by SEM; <sup>b</sup> Polymer shell thickness determined as the difference of the diameter of the core-shell rods to the bare rods measured by SEM.

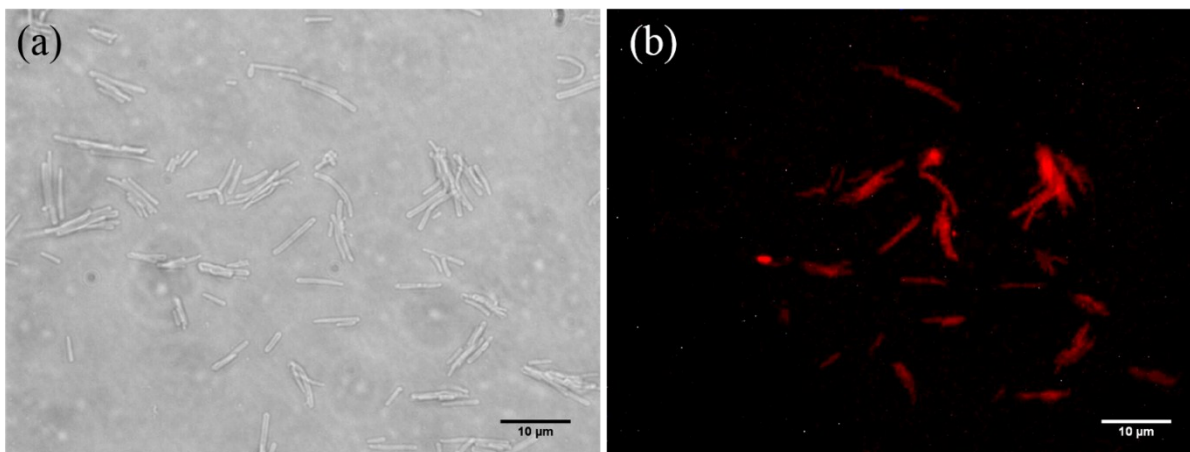

**Figure S6.** (a) Optical microscopy image in phase contrast mode and (b) fluorescence microscopy image of a dispersion of the HR-2 hollow polymer rods in water.

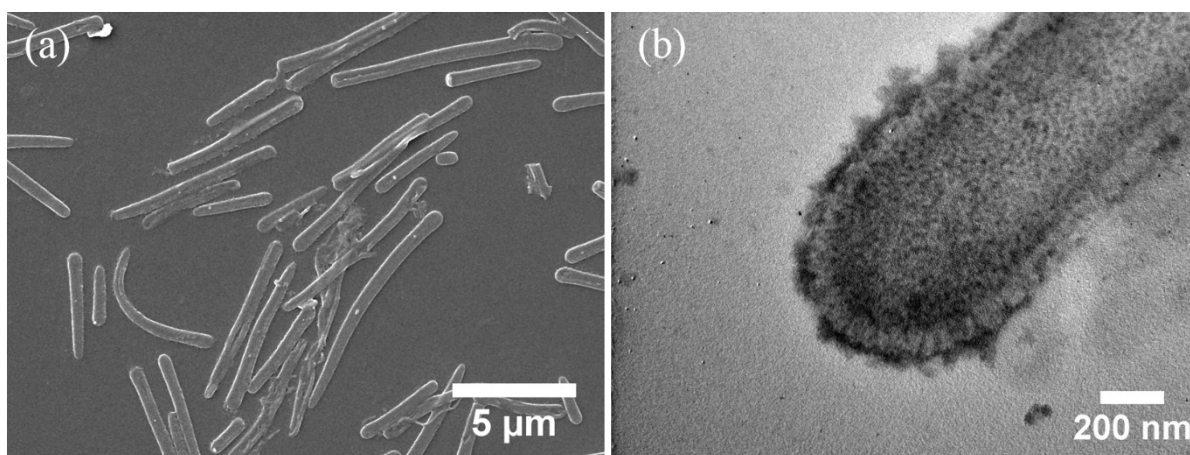

**Figure S7.** (a) SEM and (b) TEM image of the hollow polymer rods HR-2 after 7 months in water.

## References

- (1) Zhang, X.; Matyjaszewski, K. Synthesis of Well-Defined Amphiphilic Block Copolymers with 2-(Dimethylamino)Ethyl Methacrylate by Controlled Radical Polymerization. *Macromolecules* **1999**, *32* (6), 1763–1766. <https://doi.org/10.1021/ma981332f>.
- (2) Ohno, K.; Akashi, T.; Huang, Y.; Tsujii, Y. Surface-Initiated Living Radical Polymerization from Narrowly Size-Distributed Silica Nanoparticles of Diameters Less Than 100 Nm. *Macromolecules* **2010**, *43* (21), 8805–8812. <https://doi.org/10.1021/ma1018389>.
- (3) Pasetto, P.; Blas, H.; Audouin, F.; Boissière, C.; Sanchez, C.; Save, M.; Charleux, B. Mechanistic Insight into Surface-Initiated Polymerization of Methyl Methacrylate and Styrene via ATRP from Ordered Mesoporous Silica Particles. *Macromolecules* **2009**, *42* (16), 5983–5995. <https://doi.org/10.1021/ma9003506>.
